# Supplementary material
Source: Springer Nature journal article supplement (https://www.springermedizin.de/resource/supplementary/12872_2012_582_MOESM4_ESM.pdf/9430280)

**Uric Acid (mg/dL)**

7  
6  
5  
4  
3  
2

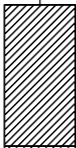

**G1**

**G2**

**G3**

Supplement: MOESM4 [file 9430280]
